# Supplementary material for: Application of functional metal anionic Lewis acid ionic liquids in the alkylation of chlorobenzene/SOCl2
Source: Royal Society of Chemistry journal article supplement (doi:10.1039/d3ra00935a), 2023-01-01
Supplement: d3ra00935a1.pdf [file d3ra00935a1.pdf]

Electronic Support Information

Application of Functional Metal Cationic Lewis  
Acid Ionic Liquid in Alkylation of Chlorobenzene  
/SOCl<sub>2</sub>

Jiru Guo <sup>a</sup>, Yanxia, Zheng <sup>a</sup>, Yuchao Li <sup>a,b,\*</sup>, Zijian Wen <sup>a</sup>, Xiuxu Shen <sup>b</sup>, Yansong  
Zhao <sup>c,\*</sup>

<sup>a</sup> School of Chemistry and Chemical Engineering, Institute of Clean Chemical  
Technology, Shandong Collegial Engineering Research Center of Novel Rare Earth  
Catalysis Materials, Shandong University of Technology, Zibo 255049, P.R. China

<sup>b</sup> Yantai Laiyang Central Hospital, No.119 Changshan Road, Laiyang, Shandong  
265200, China

<sup>c</sup> Department of Safety, Chemistry and Biomedical Laboratory Sciences, Faculty of  
Engineering and Science, Western Norway University of Applied Sciences (HVL),  
5063 Bergen, Norway

\* Corresponding author: Yuchao Li (cyulee@126.com) and Yansong Zhao  
(yansong.zhao@hvl.no).

---

# S1. Properties of ILs

## S1.1 H<sub>0</sub> test method

Fully alkaline reagent: 8% (mass fraction) sulfuric acid solution ( $H_0 = -0.20$ ). The  $pK_{BH^+}$  of  $H_0$  and the indicator 2, 4-dinitro-6-bromoaniline given  $|pK_{BH^+} - H_0| \geq 2.3$ , so they can both be used as full alkaline reagents. At 25 °C, the medium was thoroughly mixed with 2, 4-dinitro-6-bromoaniline at a concentration of 8.5 mg/L, and placed away from light for 2h to reach full alkalization. Then UV was used to determine the medium.

Full protonation reagent: 97.8% sulfuric acid ( $H_0 = -10.42$ ) with indicator 2, 4-dinitro-6-bromoaniline given  $|pK_{BH^+} - H_0| \geq 2.3$ , which can fully protonate the indicator. The protone-type solution was prepared by mixing 97.8% sulfuric acid with the indicator, and the concentration was 8.5 mg/L. After full mixing, the solution was placed away from light for 2h at room temperature, and then tested by UV after reaching full protonation.

Hammett acidity function value  $H_0$  of ionic liquid can be calculated according to the following formula  $H_0 = pK_a(I) + \lg([I]_s/[IH^+]_s)$ , where  $I$  represents alkaline indicator, and  $[IH^+]_s$  and  $[I]_s$  represent indicator concentrations of protonation and unprotonation, respectively.

The tested acid was mixed with the indicator to prepare a solution with an indicator concentration of 8.5 mg/L. After the solution was fully mixed to reach equilibrium, the ultraviolet absorption spectrum of 2, 4-

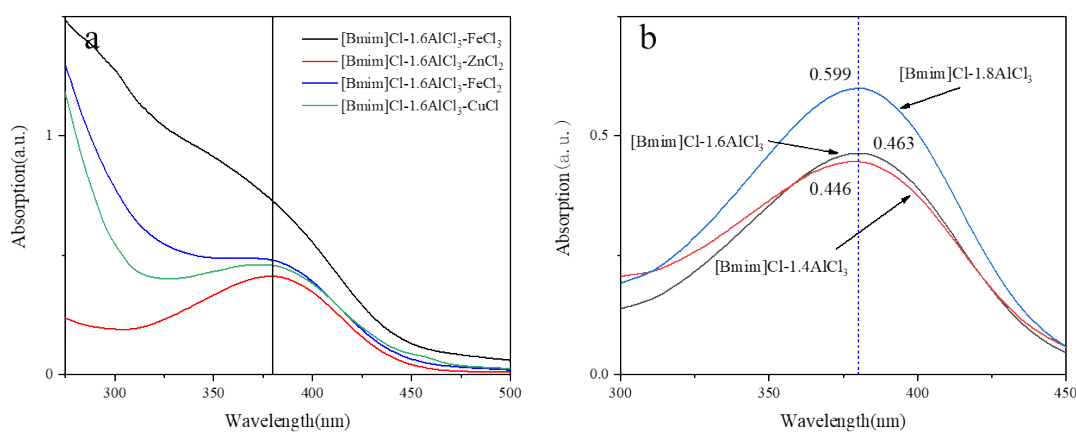

Figure S1 Uv absorption spectrum

dinitro-6-bromoaniline was scanned for determination (show as Figure. S1 and Table.S1).

**Table.S1** Acid strength of metal - based ionic liquids

| Catalyst                                      | Absorption(a.u.) | H <sub>0</sub> |
|-----------------------------------------------|------------------|----------------|
| [Bmim]Cl-1.4AlCl <sub>3</sub>                 | 0.446            | 1.08           |
| [Bmim]Cl-1.6AlCl <sub>3</sub>                 | 0.463            | 1.05           |
| [Bmim]Cl-1.8AlCl <sub>3</sub>                 | 0.599            | 0.82           |
| [Bmim]Cl-AlCl <sub>3</sub> -FeCl <sub>3</sub> | 0.741            | 0.53           |
| [Bmim]Cl-AlCl <sub>3</sub> -ZnCl <sub>2</sub> | 0.412            | 1.14           |
| [Bmim]Cl-AlCl <sub>3</sub> -FeCl <sub>2</sub> | 0.482            | 1.02           |
| [Bmim]Cl-AlCl <sub>3</sub> -CuCl              | 0.459            | 1.06           |

### S1.3 Acidity of IL

The acidity of ionic liquid [Bmim]Cl-1.6AlCl<sub>3</sub> and different complex metal-based ionic liquids was studied by Py-IR, as shown in Figure S2a. The ionic liquid [Bmim]Cl-1.6AlCl<sub>3</sub> has an obvious absorption band at 1540 cm<sup>-1</sup>, which is attributed to the presence of Brønsted acidity. In the Py-IR spectra of [Bmim]Cl-1.6AlCl<sub>3</sub>, bands appear near 1450 cm<sup>-1</sup>, indicating the presence of Lewis acid site in the ionic liquid [Bmim]Cl-1.6AlCl<sub>3</sub>.

The acidity of the complex ionic liquid [Bmim]Cl-1.6AlCl<sub>3</sub>-MCl<sub>x</sub> (molar ratio of AlCl<sub>3</sub>: MCl<sub>x</sub> is 12:1) was analyzed by infrared spectroscopy using pyridine as a probe (Figure S2b). The peak near 1540 cm<sup>-1</sup> in [Bmim]Cl-1.6AlCl<sub>3</sub> was compared with the corresponding peak in the presence of MCl<sub>x</sub>. After the addition of IL by FeCl<sub>3</sub>, ZnCl<sub>2</sub>, FeCl<sub>2</sub> or CuCl, the wave number showed an obvious absorption peak near 1540 cm<sup>-1</sup>. This indicates that IL retains the original Brønsted acidity. The acidity order of Brønsted is FeCl<sub>3</sub>>ZnCl<sub>2</sub>>FeCl<sub>2</sub>>CuCl. At the same time, there was an obvious absorption peak near 1450 cm<sup>-1</sup> wave number, indicating that IL possessed Lewis acidity. Moreover, in Figure S2b, Lewis acidity improves significantly at its peak around 1450 cm<sup>-1</sup> Figure S2b with the addition of FeCl<sub>3</sub>, ZnCl<sub>2</sub>, FeCl<sub>2</sub>, or CuCl.

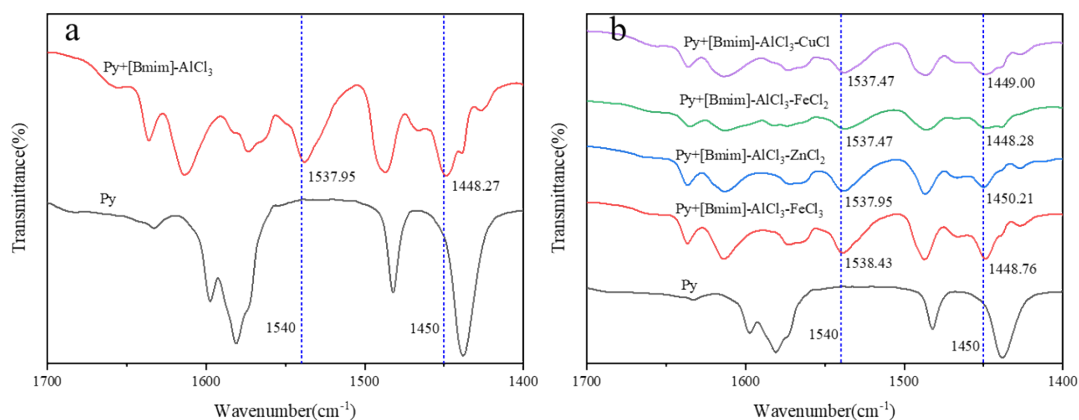

Figure S2 Py-IR spectrum

### S1.4 By-product analysis

We performed LC-MS tests on the reaction system after the reaction. We analyzed the test results in conjunction with references, as shown in Figure R1. Among them are S-Aryl Arenesulfonothioate (Figure S3 a), 2,4'-dichlorodiphenyl sulfone (Figure S3 b), 2,2'-dichlorodiphenyl sulfone (Figure S3 c), and a very small amount of dimer of 4,4'-dichlorodiphenyl sulfone (Figure S3 d). The halogen atom, as a class of substituents, readily activates the benzene ring to undergo pro- and interposition substitution, resulting in the isomers with o-position substitution. At the same time, a very small fraction of 4,4'-dichlorodiphenyl sulfoxide is oxidized in an oxygen environment and polymerized in an acidic environment, resulting in the dimerization of 4,4'-dichlorodiphenyl sulfone.

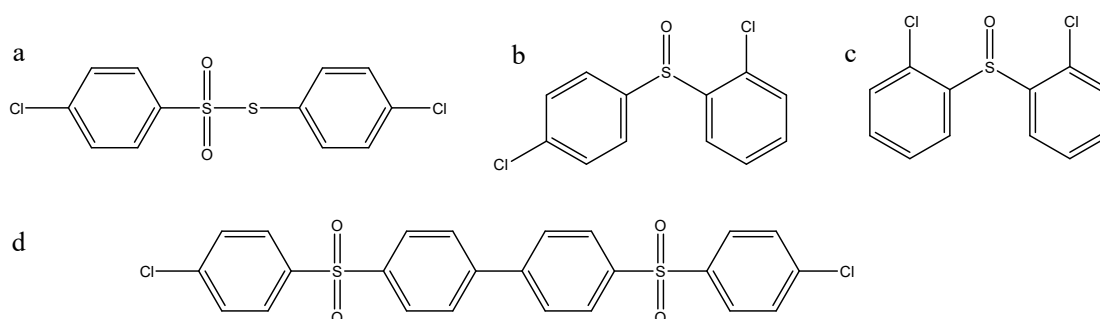

Figure S3 Structural formula of main by-products

## S1.5 ICP test

The ICP test results are shown in Table S2. The tested content in the ICP test values did not differ much from the theoretical values.

**Table S2** Elemental content in IL

| Catalyst                                              | Elemental content/(mg/kg) |                    |                     |                    |                     |                    |
|-------------------------------------------------------|---------------------------|--------------------|---------------------|--------------------|---------------------|--------------------|
|                                                       | Al                        |                    | Fe                  |                    | Zn                  |                    |
|                                                       | Theoretical content       | Actual content     | Theoretical content | Actual content     | Theoretical content | Actual content     |
| [Bmim]Cl-<br>1.6AlCl <sub>3</sub>                     | $1.11 \times 10^5$        | $1.11 \times 10^5$ |                     |                    |                     |                    |
| [Bmim]Cl-<br>AlCl <sub>3</sub> -<br>FeCl <sub>3</sub> | $1.05 \times 10^5$        | $1.05 \times 10^5$ | $1.82 \times 10^4$  | $1.83 \times 10^4$ |                     |                    |
| [Bmim]Cl-<br>AlCl <sub>3</sub> -<br>ZnCl <sub>2</sub> | $1.06 \times 10^5$        | $1.06 \times 10^5$ |                     |                    | $2.15 \times 10^4$  | $2.14 \times 10^4$ |

## S2. Blank control experiment of metal salt catalysis

**Table.S3** Blank comparison of metal salt catalysis

| Catalyst          | Conversion/% | Selectivity/% |
|-------------------|--------------|---------------|
| FeCl <sub>3</sub> | 82.6         | 2.2           |
| FeCl <sub>2</sub> | 96.4         | 0.71          |
| CuCl              | 100          | 0.21          |
